# Supplementary material
Source: PubMed Central journal article supplement (PMC5528323)

Supplementary Figure 2

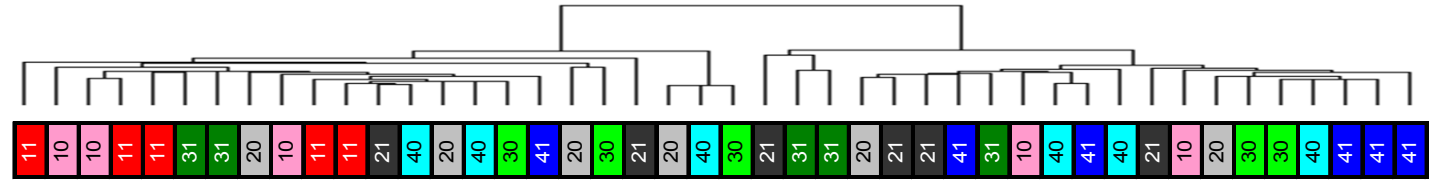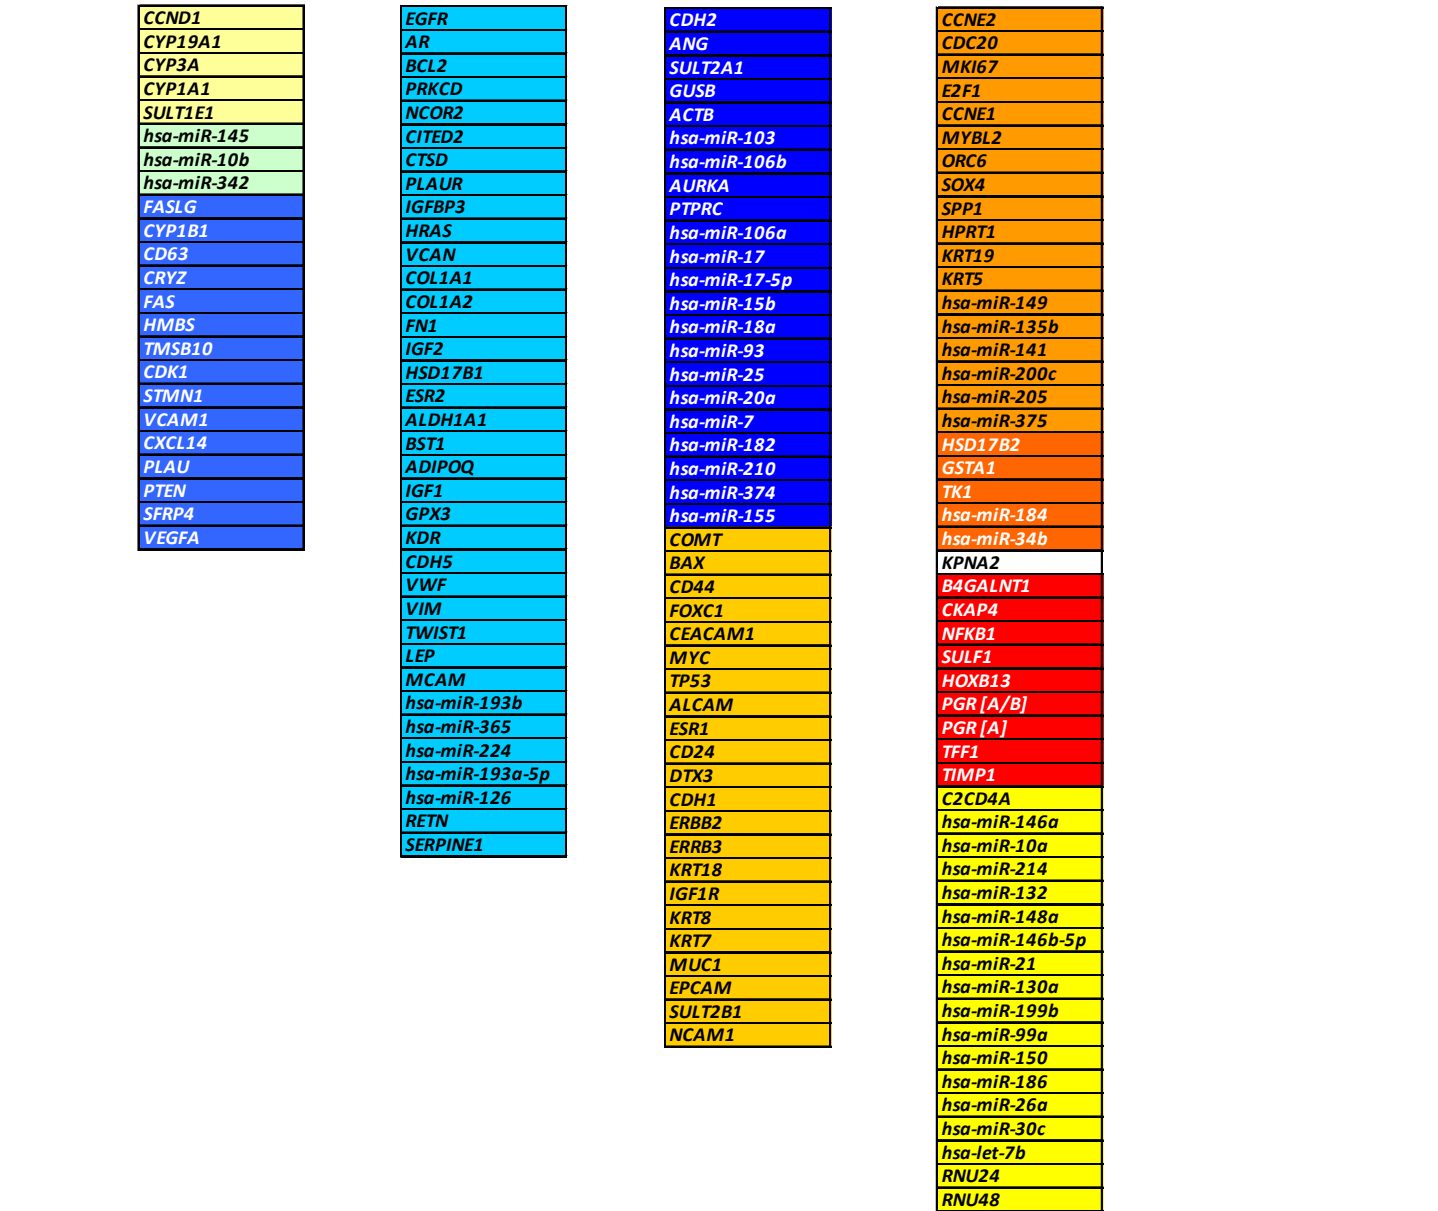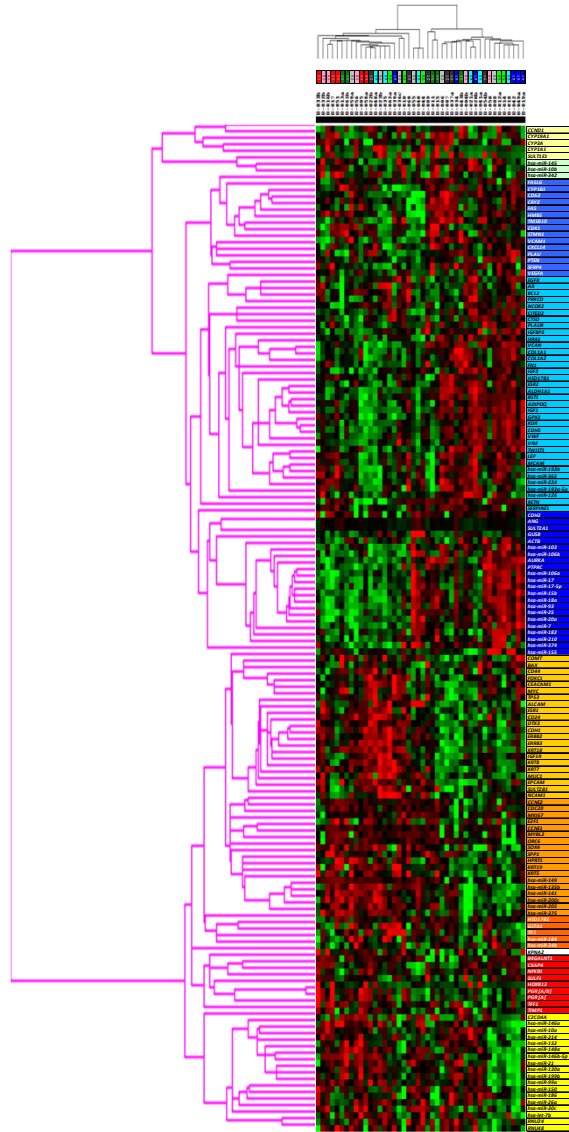

Supplement: MOL2-5-504-s002.pdf [file MOL2-5-504-s002.pdf]
